# Supplementary material for: A dual electrochemical microsensor for simultaneous imaging of oxygen and pH over the rat kidney surface
Source: Royal Society of Chemistry journal article supplement (doi:10.1039/c3an00878a), 2013-01-01
Supplement: c3an00878a.pdf [file c3an00878a.pdf]

**Supplementary Information for**

**A dual electrochemical microsensor for simultaneous imaging of oxygen and  
pH over rat kidney surface**

Yejin Ha <sup>a</sup>, Dongshin Myung <sup>a</sup>, Jun Ho Shim <sup>a,b</sup>, Myung Hwa Kim <sup>a</sup>, and Youngmi Lee <sup>a,\*</sup>

<sup>a</sup>*Department of Chemistry and Nano Science, Ewha Womans University, Seoul, 120-750, Korea*

<sup>b</sup>*Department of Chemistry, Daegu University, Gyeongsan 712-714, Korea*

\*Corresponding author: (Fax) +82-2-3277-2384, (E-mail) [youngmilee@ewha.ac.kr](mailto:youngmilee@ewha.ac.kr)

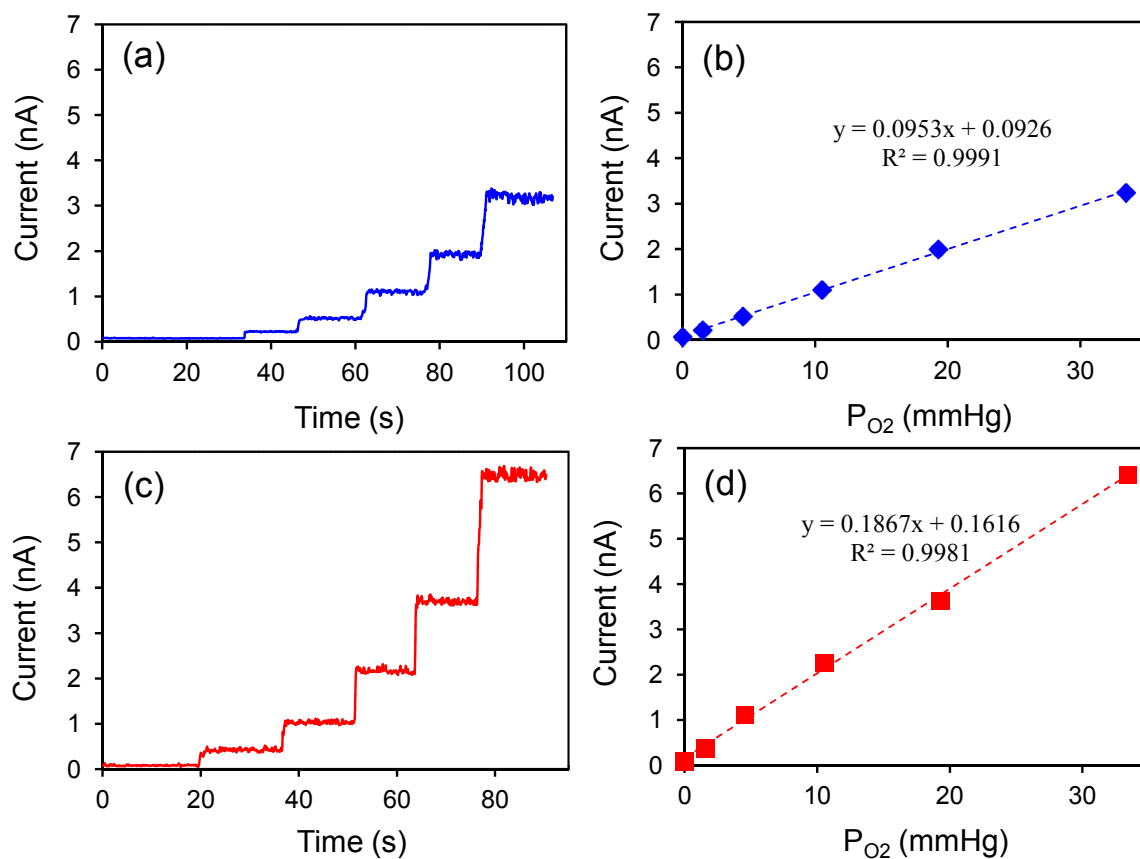

**Fig. S1.** Dynamic current changes (a,c) and corresponding calibration curves (b,d) of WE1 responding to varying  $P_{O_2}$  in PBS solution (pH =7.4). WE1 is Pt black deposited planar Pt disk (a,b) without or (c,d) with poly-FED coating. Each Pt disk diameter of the dual electrode is 10  $\mu\text{m}$ .

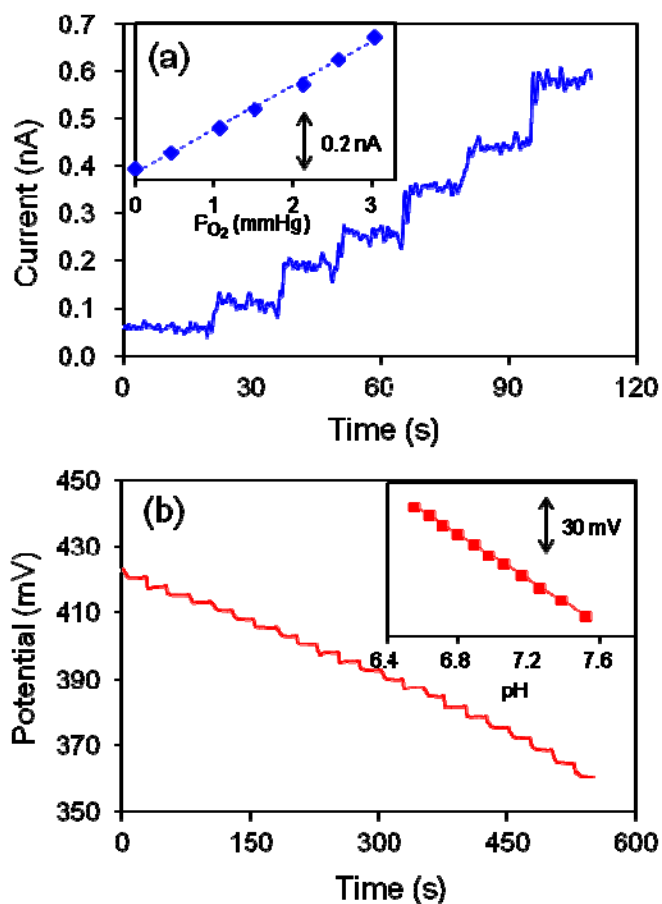

**Fig. S2.** The typical dynamic response curves of (a) WE1 and (b) WE2 to small changes of (a)  $P_{O_2}$  and (b) pH. The applied potential to WE1 was  $-0.6$  V vs. Ag/AgCl. (a) Current of WE1 was recorded with the successive additions of an  $O_2$  standard solution into a deaerated 4 mM PBS solution. (b) Potential of WE2 was measured in universal buffer with the successive injections of a saturated NaOH solution to alter the solution pH. Insets show the corresponding calibration curves. (a) WE1 sensitivity to  $P_{O_2}$  is  $166.8$   $\mu\text{A mmHg}^{-1}$ ; (b) potential response slope per pH of WE2 is  $-59.197$   $\text{mV pH}^{-1}$ .

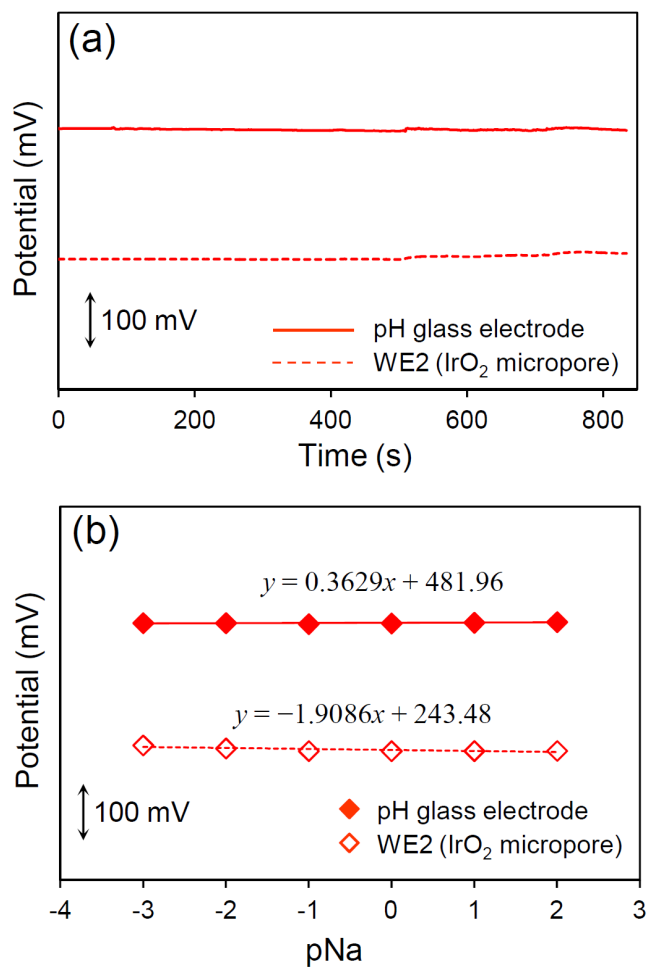

**Fig. S3.** (a) Dynamic potential changes of WE2 of dual sensor and commercial pH glass electrode (Istek, Korea) responding to sodium ion concentration. The sodium ion concentration was increased from 0.01 mM to 1.0 M in a universal buffer solution. (b) Corresponding calibration curves.

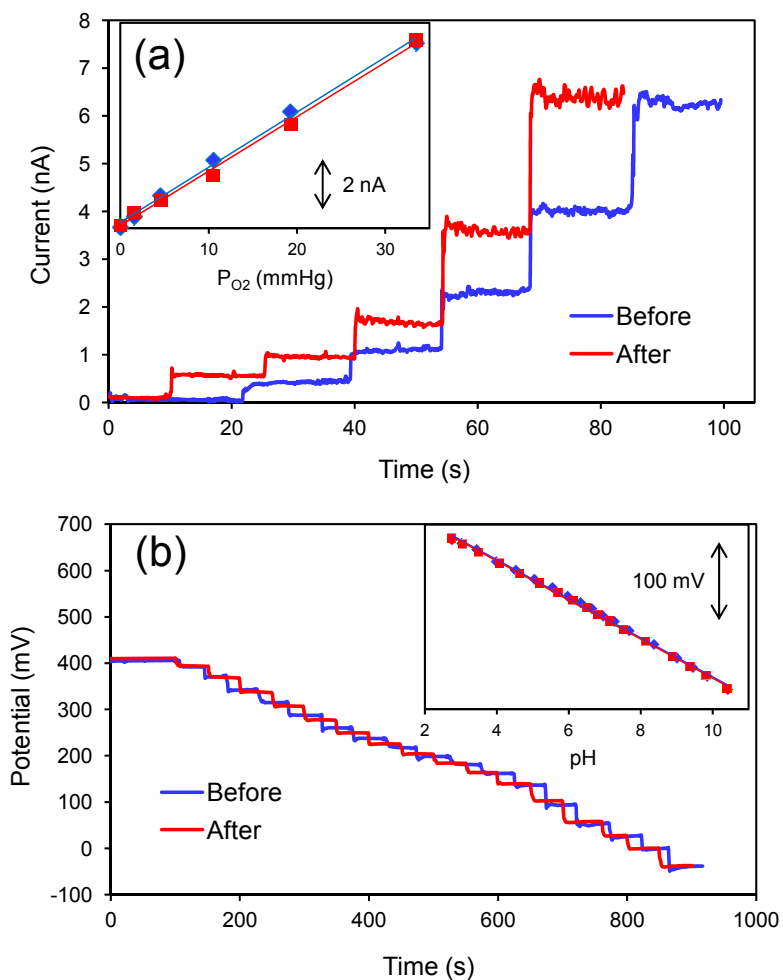

**Fig. S4.** Comparison of dynamic response curves of WE1 and WE2 to (a) P<sub>O<sub>2</sub></sub> and (b) pH before and after 2.5 h kidney tissue imaging experiment. The applied potential to WE1 was  $-0.6$  V vs. Ag/AgCl. (a) Current of WE1 was recorded with the successive additions of an O<sub>2</sub> standard solution into a deaerated 4 mM PBS solution. (b) Potential of WE2 was measured in universal buffer with the successive injections of a saturated NaOH solution to alter the solution pH. Insets show the corresponding calibration curves. (a) WE1 sensitivities to P<sub>O<sub>2</sub></sub> are 187.3 and 187.5 pA mmHg<sup>-1</sup> before and after tissue imaging, respectively; (b) potential response slopes per pH of WE2 are  $-58.133$  and  $-58.130$  mV pH<sup>-1</sup> before and after tissue imaging, respectively.

**Table S1.** Comparison of the sensor performances between our dual O<sub>2</sub>/pH microsensors vs. previously reported single amperometric O<sub>2</sub> microsensor or single potentiometric pH sensor used for biological samples.

| Amperometric O <sub>2</sub> microsensor |                                     |                     |                                 | Potentiometric IrO <sub>x</sub> -based pH sensor |                                     |                        |                                   | References   |
|-----------------------------------------|-------------------------------------|---------------------|---------------------------------|--------------------------------------------------|-------------------------------------|------------------------|-----------------------------------|--------------|
| Sensitivity (pA mmHg <sup>-1</sup> )    | Response time, t <sub>90%</sub> (s) | Linear range (mmHg) | Electrode size (diameter in μm) | Sensitivity (mV pH <sup>-1</sup> )               | Response time, t <sub>90%</sub> (s) | Linear range (pH unit) | Electrode area (mm <sup>2</sup> ) |              |
| 168.4±33.8                              | 0.17±0.05                           | ~100                | 10                              | 58.3±1.5                                         | 0.43±0.09                           | 2~11                   | 0.0000785                         | Current work |
| 0.6~3                                   | -                                   | -                   | 1.5~4                           |                                                  |                                     |                        |                                   | 6            |
| 2~6                                     | -                                   | -                   | 1                               |                                                  |                                     |                        |                                   | 7            |
| 294.7                                   | ~37.5                               | ~33                 | 25                              |                                                  |                                     |                        |                                   | 8            |
| 266.3±0.6                               | Sub-seconds                         | 37~149              | 127                             |                                                  |                                     |                        |                                   | 9            |
| 1.62±0.04                               | 2.6±0.5                             | ~150                | 3 in diameter<br>4.2 in length  |                                                  |                                     |                        |                                   | 10           |
| 1.00±0.27                               | -                                   | -                   | 9.6±3.1                         |                                                  |                                     |                        |                                   | 12           |
| 2550±20                                 | -                                   | ~702                | 200                             |                                                  |                                     |                        |                                   | 13,14        |
|                                         |                                     |                     |                                 | 63.5±2.2                                         | <5                                  | 2~10                   | -                                 | 21,22        |
|                                         |                                     |                     |                                 | 57.8±1.5                                         | <5                                  | 6.5~8.2                | 80                                | 23           |
|                                         |                                     |                     |                                 | 77.6±2                                           | 6                                   | 4~11                   | 0.0004                            | 24           |
|                                         |                                     |                     |                                 | 55~70                                            | 6~15                                | 4~11                   | 0.008                             | 25           |
|                                         |                                     |                     |                                 | 59.5~69                                          | <2                                  | 3~12                   | -                                 | 26           |
|                                         |                                     |                     |                                 | 74.4±0.0008                                      | <2                                  | 4~11                   | 0.0044                            | 27           |
|                                         |                                     |                     |                                 | 63±5                                             | -                                   | 6~8.5                  | 0.012                             | 28           |
|                                         |                                     |                     |                                 | 68~76                                            | 2.3                                 | 6~8                    | 0.0004                            | 29           |
|                                         |                                     |                     |                                 | 72.9±0.9                                         | -                                   | 3~11                   | 0.00012, 0.0003                   | 30           |
